# Supplementary material for: Visible-Light-Assisted Photoelectrochemical Biosensing of Uric Acid Using Metal-Free Graphene Oxide Nanoribbons
Source: MDPI journal article supplement (doi:10.3390/nano11102693), 2021-10-13
Supplement: s1 [file s1]

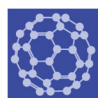

Supplementary Materials

# Visible-Light-Assisted Photoelectrochemical Biosensing of Uric Acid Using Metal-Free Graphene Oxide Nanoribbons

Chia-Liang Sun <sup>1,2,\*</sup>, Cheng-Hsuan Lin <sup>1</sup>, Chia-Heng Kuo <sup>1</sup>, Chia-Wei Huang <sup>1</sup>, Duc Dung Nguyen <sup>3</sup>,  
Tsu-Chin Chou <sup>4</sup>, Cheng-Ying Chen <sup>5</sup>, Yu-Jen Lu <sup>2,\*</sup>

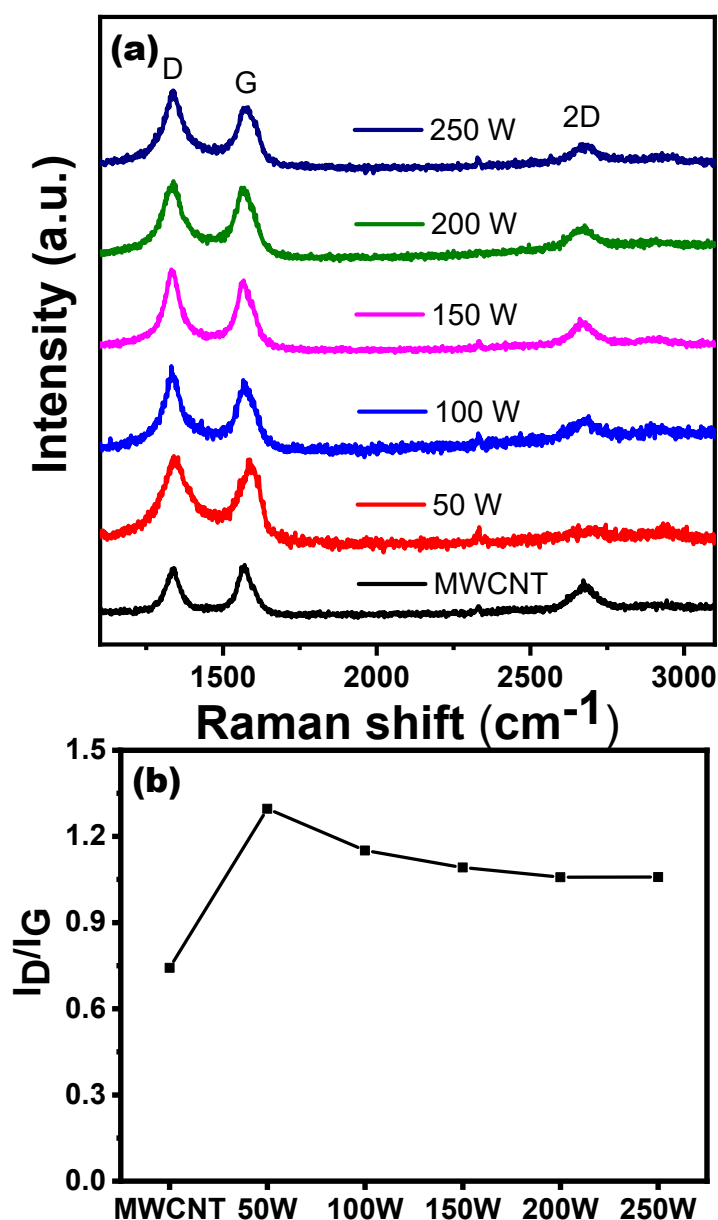

**Figure S1.** (a) Raman spectra of MWCNT, GONR(50 W), GONR(100 W), GONR (150 W), GONR(200 W), and GONR (250 W) before and after unzipping process. (b) The corresponding ID/IG summary figure of Figure S1(a).

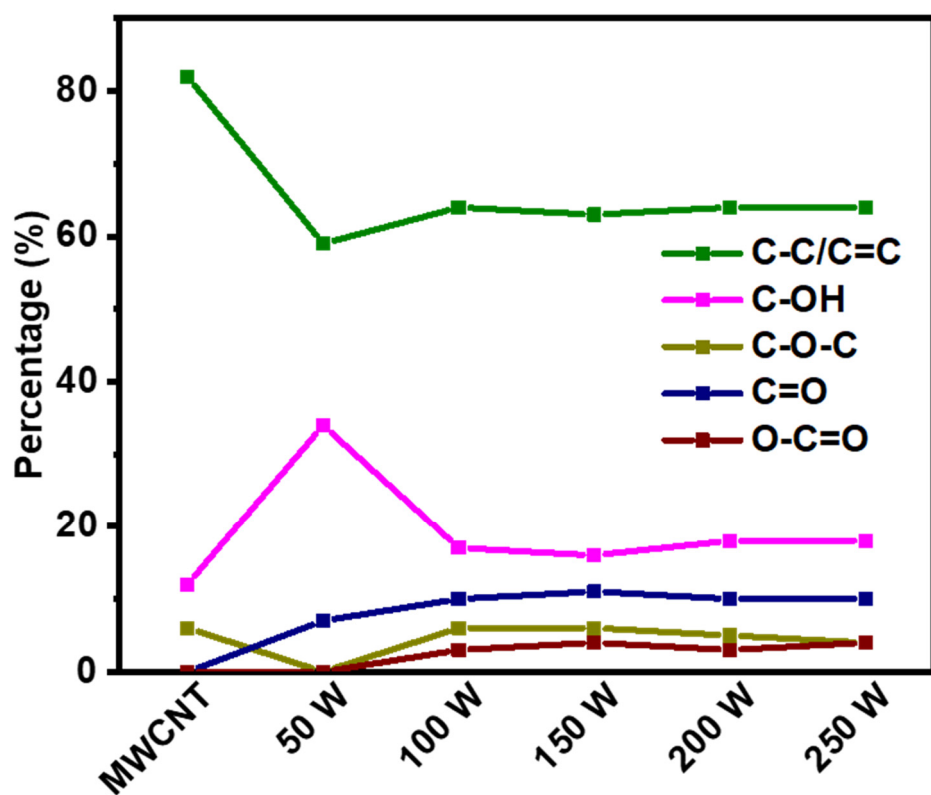

**Figure S2.** The corresponding bonding ratios of MWCNT, GONR(50 W), GONR(100 W), GONR(150 W), GONR(200 W), and GONR(250 W) derived from Figure 2.

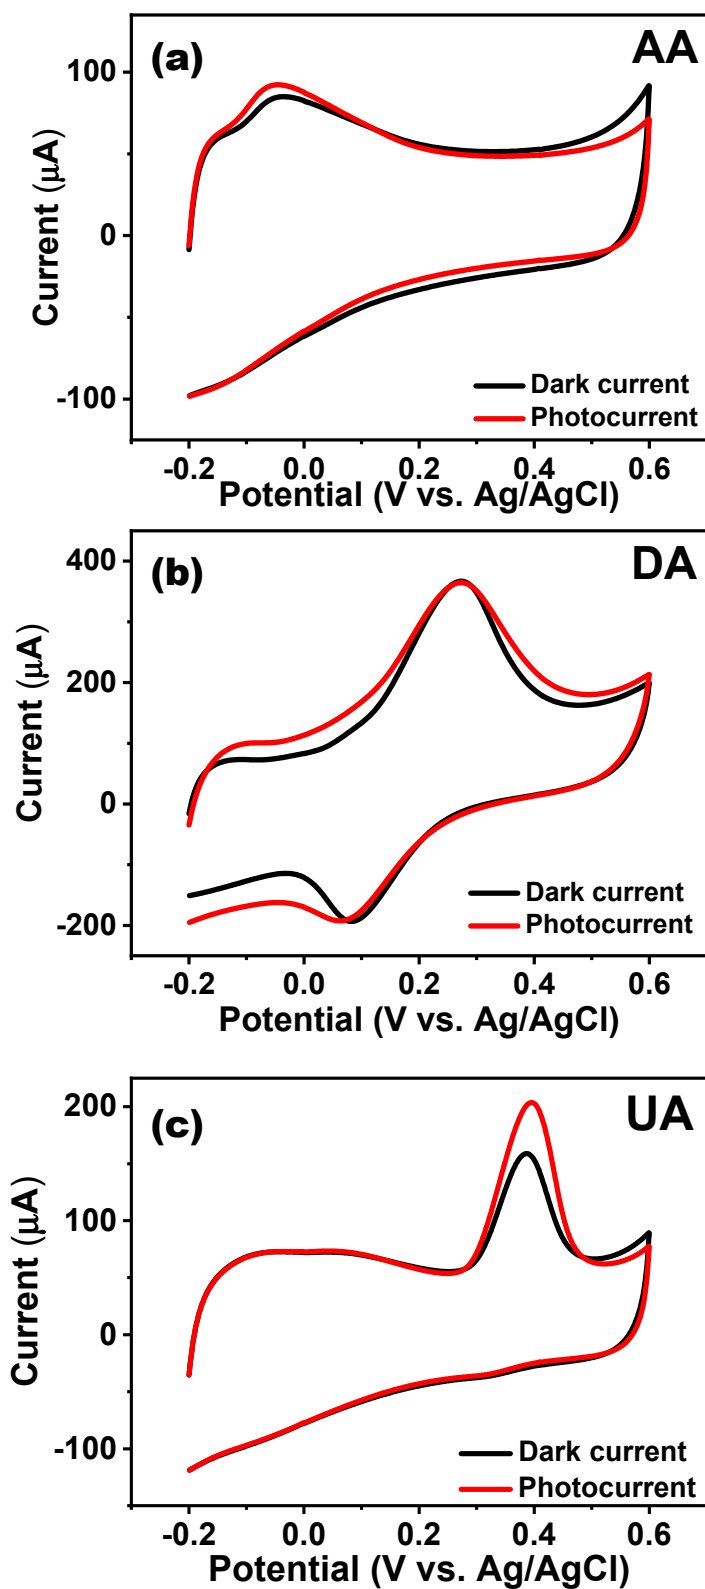

**Figure S3.** Cyclic voltammograms of GONR(200 W) in the electrolyte containing 0.1 M PBS and (a) 1 mM AA, (b) 1 mM DA, and (c) 0.3 mM UA at the scan rate of 50 mV/s with or without light (AM 1.5) illumination. The screen-printed carbon electrode was used for preparing the working electrode in Figure S3.

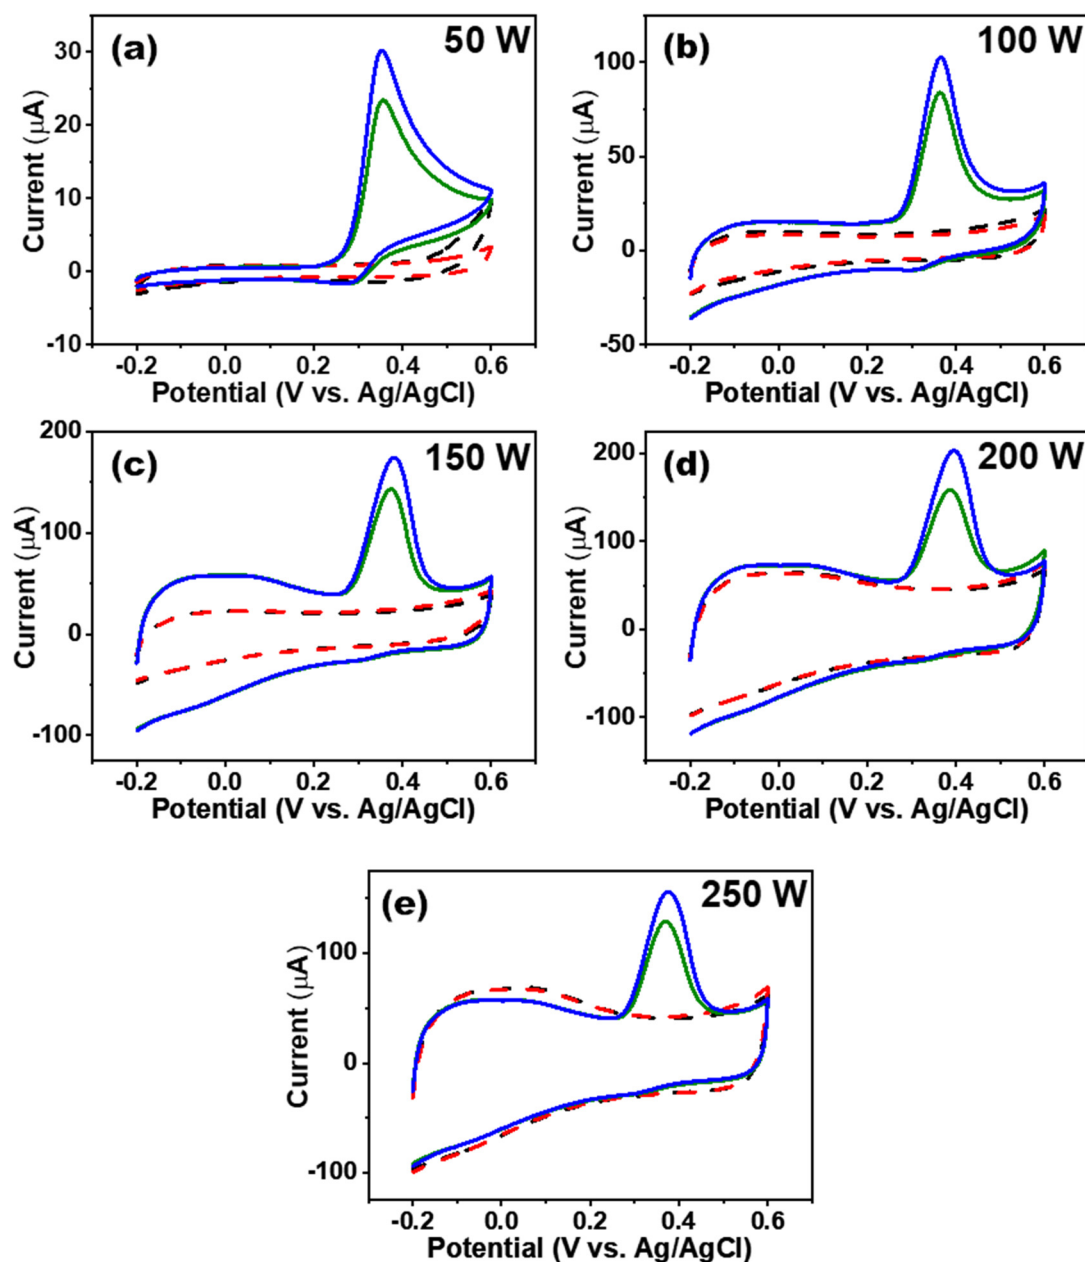

**Figure S4.** Cyclic voltammograms of (a) GONR(50 W), (b) GONR(100 W), (c) GONR(150 W), (d) GONR(200 W), and (e) GONR(250 W) with (blue line) or without (green line) light (AM 1.5) illumination. (electrolyte: 0.3 mM UA + 0.1 M PBS, scan rate: 50 mV/s) The dash lines are the curves for dark currents with 0 mM UA with (black) or without (red) illumination. The screen-printed carbon electrode was used for preparing the working electrode in Figure S4.

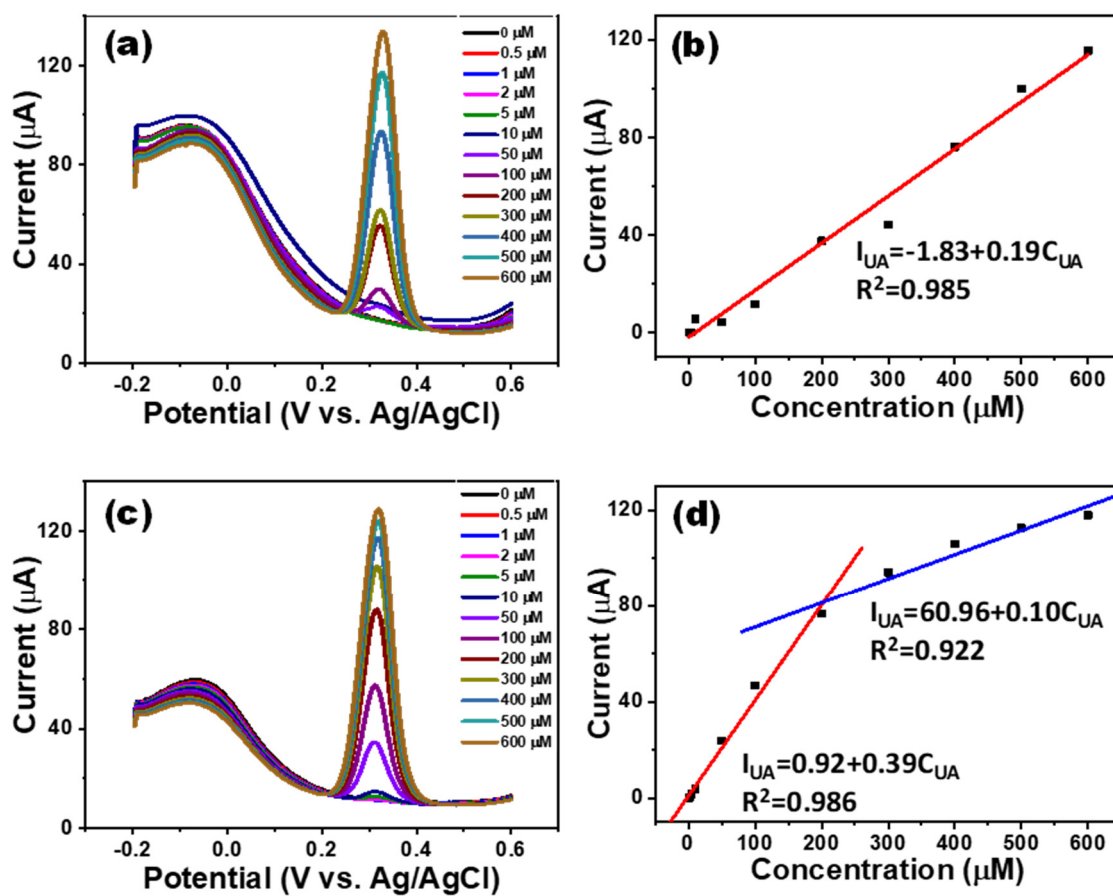

**Figure S5** Differential pulse voltammetry curves of GONR(200 W) in 0.1 M PBS containing 0.5–600.0 mM UA (a) without light illumination and (c) with LED light (420 nm, 80 mW/cm<sup>2</sup>). (b, d) The corresponding plots of the oxidation current of UA ( $I_{\text{UA}}$ ) vs. the UA concentration ( $C_{\text{UA}}$ ) for (a, c). The glassy carbon electrode was used for preparing the working electrode in Figure S5.

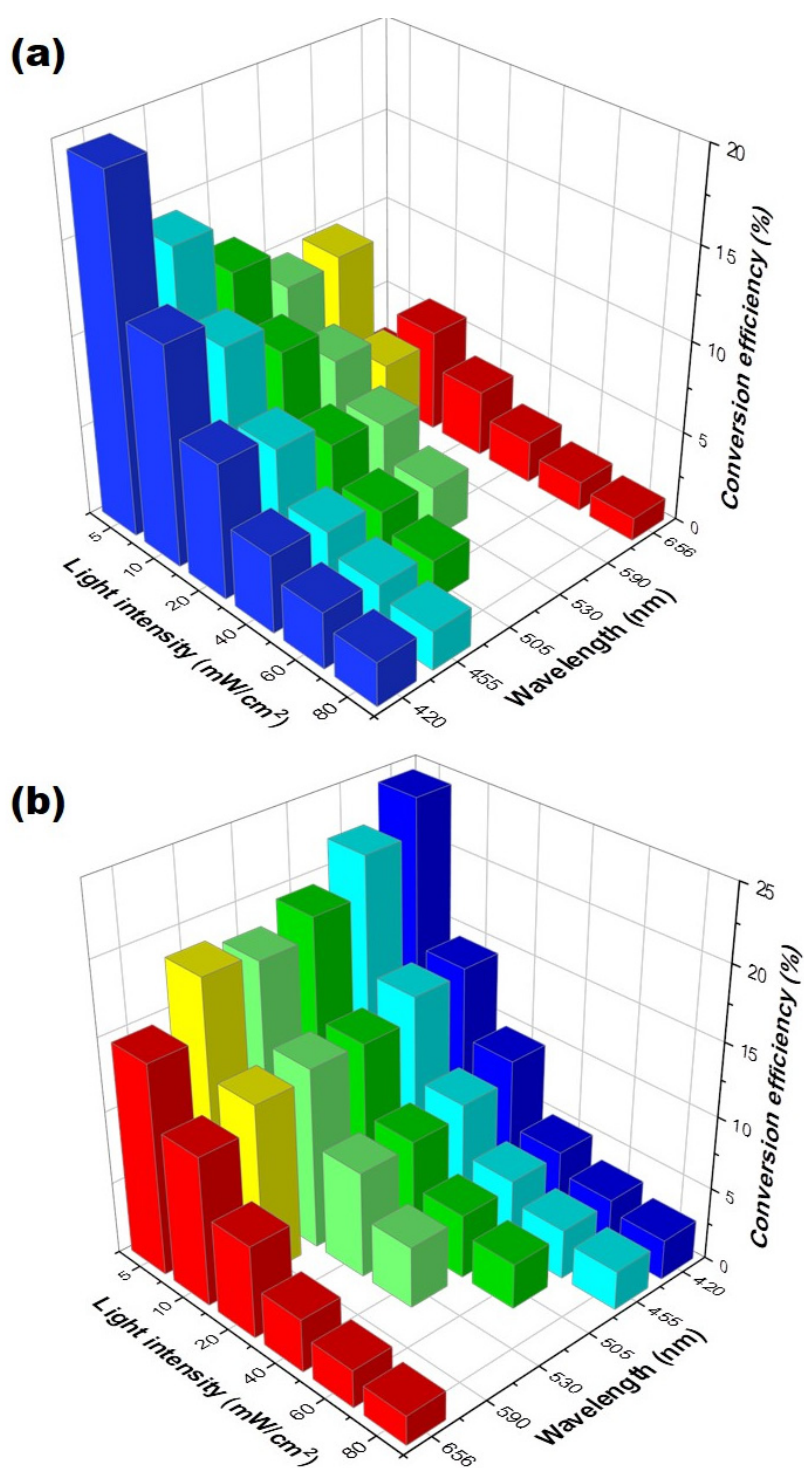

**Figure S6.** The summary figure of conversion efficiencies in cyclic voltammograms of GONR(200 W) with light (LED) illumination using different wavelengths and light intensities derived from Figure 5. (a) The sequences of wavelength selections switch from 420 nm to 656 nm. (b) The sequences switch from 656 nm to 420 nm.

**Table S1.** Conversion efficiency (%) calculation for 420 nm with 5 mW/cm<sup>2</sup>

| <b>The cyclic voltammetry (CV) measurement results with an anodic peak for oxidation of uric acid</b>                                                                                                                                                                                                                                                                                     |                                                                                        |
|-------------------------------------------------------------------------------------------------------------------------------------------------------------------------------------------------------------------------------------------------------------------------------------------------------------------------------------------------------------------------------------------|----------------------------------------------------------------------------------------|
| $\text{Conversion Efficiency} = \frac{\text{Number of electrons per Time interval}}{\text{Number of photons per Time interval}} \times 100$ $= \frac{(\text{Photo assisted} - \text{Dark Faradaic current}) \times 10^6 \times 6.242 \times 10^{18} \times \text{Time interval}}{\text{Photon flux} \times \text{Area of 3 mm – diameter circle} \times \text{Time interval}} \times 100$ |                                                                                        |
| Light Source                                                                                                                                                                                                                                                                                                                                                                              | LED Lamp                                                                               |
| Light intensity (mW/cm <sup>2</sup> )                                                                                                                                                                                                                                                                                                                                                     | 5                                                                                      |
| Wavelength (nm)                                                                                                                                                                                                                                                                                                                                                                           | 420                                                                                    |
| Photon Flux<br>(number of photons/sec·m <sup>2</sup> )                                                                                                                                                                                                                                                                                                                                    | $5 \times 10 \times 420 \times 10^{16} / (1.24 \times 1.6)$<br>$= 1.06 \times 10^{20}$ |
| Area of 3-mm-diameter circle (m <sup>2</sup> )                                                                                                                                                                                                                                                                                                                                            | $7.1 \times 10^{-6}$                                                                   |
| Scan rate (V/s)                                                                                                                                                                                                                                                                                                                                                                           | 0.05                                                                                   |
| Peak potential step (V)                                                                                                                                                                                                                                                                                                                                                                   | 0.001                                                                                  |
| Time interval (s)                                                                                                                                                                                                                                                                                                                                                                         | $0.001/0.05 = 0.02$                                                                    |
| Number of photons<br>(0.02 sec and 3-mm-diameter circle)                                                                                                                                                                                                                                                                                                                                  | $1.06 \times 10^{20} \times 7.1 \times 10^{-6} \times 0.02 = 1.5 \times 10^{13}$       |
| Dark Faradaic current (μA)                                                                                                                                                                                                                                                                                                                                                                | 95.19                                                                                  |
| Photo-assisted Faradaic current (μA)                                                                                                                                                                                                                                                                                                                                                      | 118.6                                                                                  |
| Number of electrons per Coulomb                                                                                                                                                                                                                                                                                                                                                           | $6.242 \times 10^{18}$                                                                 |
| 0.02 sec (number of electrons)                                                                                                                                                                                                                                                                                                                                                            | $(118.6 - 95.19) \times 6.242 \times 10^{12} \times 0.02$<br>$= 2.92 \times 10^{12}$   |
| Conversion efficiency at peak in CV                                                                                                                                                                                                                                                                                                                                                       | $2.92 \times 10^{12} / 1.5 \times 10^{13} = 19.44$                                     |

**Table S2.** Conversion efficiency (%) calculation for 656 nm with 80 mW/cm<sup>2</sup>

| Light Source                                             | LED Lamp                                                                                |
|----------------------------------------------------------|-----------------------------------------------------------------------------------------|
| Light intensity (mW/cm <sup>2</sup> )                    | 80                                                                                      |
| Wavelength (nm)                                          | 656                                                                                     |
| Photon Flux<br>(number of photons/sec·m <sup>2</sup> )   | $80 \times 10 \times 656 \times 10^{16} / (1.24 \times 1.6)$<br>$= 2.65 \times 10^{21}$ |
| Area of 3-mm-diameter circle (m <sup>2</sup> )           | $7.1 \times 10^{-6}$                                                                    |
| Scan rate (V/s)                                          | 0.05                                                                                    |
| Peak potential step (V)                                  | 0.001                                                                                   |
| Time interval (s)                                        | $0.001/0.05 = 0.02$                                                                     |
| Number of photons<br>(0.02 sec and 3-mm-diameter circle) | $2.65 \times 10^{21} \times 7.1 \times 10^{-6} \times 0.02 = 3.76 \times 10^{14}$       |
| Dark Faradaic current (μA)                               | 91.46                                                                                   |
| Photo-assisted Faradaic current (μA)                     | 152.6                                                                                   |
| Number of electrons per Coulomb                          | $6.242 \times 10^{18}$                                                                  |
| 0.02 sec (number of electrons)                           | $(152.6 - 91.46) \times 6.242 \times 10^{12} \times 0.02$<br>$= 7.63 \times 10^{12}$    |
| Conversion efficiency at peak in CV                      | $7.63 \times 10^{12} / 3.76 \times 10^{14} = 2.03$                                      |



Table S3. Calculation details when light illumination was carried out from 420 nm to 656 nm.

| Wavelength (nm) | Light intensity (mW/cm <sup>2</sup> ) | Photon flux (# of photons/sec × m <sup>2</sup> ) | # of photons (0.02 sec and 3-mm-diameter circle) | Dark Faradaic current (μA) | Photo-assisted Faradaic current (μA) | 0.02 sec (# of electrons) | Conversion Efficiency (%) at peak in CV |
|-----------------|---------------------------------------|--------------------------------------------------|--------------------------------------------------|----------------------------|--------------------------------------|---------------------------|-----------------------------------------|
| 420             | 80                                    | $1.69 \times 10^{21}$                            | $2.40 \times 10^{14}$                            | 95.19                      | 142                                  | $5.84 \times 10^{12}$     | 2.43                                    |
| 420             | 60                                    | $1.27 \times 10^{21}$                            | $1.80 \times 10^{14}$                            | 95.19                      | 140.3                                | $5.63 \times 10^{12}$     | 3.12                                    |
| 420             | 40                                    | $8.47 \times 10^{20}$                            | $1.20 \times 10^{14}$                            | 95.19                      | 136.7                                | $5.18 \times 10^{12}$     | 4.31                                    |
| 420             | 20                                    | $4.23 \times 10^{20}$                            | $6.01 \times 10^{13}$                            | 95.19                      | 131.2                                | $4.50 \times 10^{12}$     | 7.48                                    |
| 420             | 10                                    | $2.12 \times 10^{20}$                            | $3.01 \times 10^{13}$                            | 95.19                      | 124.4                                | $3.65 \times 10^{12}$     | 12.13                                   |
| 420             | 5                                     | $1.06 \times 10^{20}$                            | $1.50 \times 10^{13}$                            | 95.19                      | 118.6                                | $2.92 \times 10^{12}$     | 19.44                                   |
| 455             | 80                                    | $1.83 \times 10^{21}$                            | $2.61 \times 10^{14}$                            | 95.19                      | 140                                  | $5.59 \times 10^{12}$     | 2.15                                    |
| 455             | 60                                    | $1.38 \times 10^{21}$                            | $1.95 \times 10^{14}$                            | 95.19                      | 138.5                                | $5.41 \times 10^{12}$     | 2.77                                    |
| 455             | 40                                    | $9.17 \times 10^{20}$                            | $1.30 \times 10^{14}$                            | 95.19                      | 135.4                                | $5.02 \times 10^{12}$     | 3.85                                    |
| 455             | 20                                    | $4.59 \times 10^{20}$                            | $6.51 \times 10^{13}$                            | 95.19                      | 129.9                                | $4.33 \times 10^{12}$     | 6.65                                    |
| 455             | 10                                    | $2.29 \times 10^{20}$                            | $3.26 \times 10^{13}$                            | 95.19                      | 122.7                                | $3.43 \times 10^{12}$     | 10.55                                   |
| 455             | 5                                     | $1.15 \times 10^{20}$                            | $1.63 \times 10^{13}$                            | 95.19                      | 114                                  | $2.35 \times 10^{12}$     | 14.42                                   |
| 505             | 80                                    | $2.04 \times 10^{21}$                            | $2.89 \times 10^{14}$                            | 95.19                      | -                                    | -                         | -                                       |
| 505             | 60                                    | $1.53 \times 10^{21}$                            | $2.17 \times 10^{14}$                            | 95.19                      | 135                                  | $4.97 \times 10^{12}$     | 2.29                                    |
| 505             | 40                                    | $1.02 \times 10^{21}$                            | $1.45 \times 10^{14}$                            | 95.19                      | 132.6                                | $4.67 \times 10^{12}$     | 3.23                                    |
| 505             | 20                                    | $5.09 \times 10^{20}$                            | $7.23 \times 10^{13}$                            | 95.19                      | 125.8                                | $3.82 \times 10^{12}$     | 5.29                                    |
| 505             | 10                                    | $2.55 \times 10^{20}$                            | $3.61 \times 10^{13}$                            | 95.19                      | 120.8                                | $3.20 \times 10^{12}$     | 8.85                                    |
| 505             | 5                                     | $1.27 \times 10^{20}$                            | $1.81 \times 10^{13}$                            | 95.19                      | 112.2                                | $2.12 \times 10^{12}$     | 11.75                                   |
| 530             | 80                                    | $2.14 \times 10^{21}$                            | $3.03 \times 10^{14}$                            | 95.19                      | -                                    | -                         | -                                       |
| 530             | 60                                    | $1.60 \times 10^{21}$                            | $2.28 \times 10^{14}$                            | 95.19                      | -                                    | -                         | -                                       |
| 530             | 40                                    | $1.07 \times 10^{21}$                            | $1.52 \times 10^{14}$                            | 95.19                      | 130.6                                | $4.42 \times 10^{12}$     | 2.91                                    |
| 530             | 20                                    | $5.34 \times 10^{20}$                            | $7.59 \times 10^{13}$                            | 95.19                      | 124.5                                | $3.66 \times 10^{12}$     | 4.82                                    |
| 530             | 10                                    | $2.67 \times 10^{20}$                            | $3.79 \times 10^{13}$                            | 95.19                      | 116.2                                | $2.62 \times 10^{12}$     | 6.91                                    |
| 530             | 5                                     | $1.34 \times 10^{20}$                            | $1.90 \times 10^{13}$                            | 95.19                      | 109.8                                | $1.82 \times 10^{12}$     | 9.62                                    |
| 590             | 80                                    | $2.38 \times 10^{21}$                            | $3.38 \times 10^{14}$                            | 95.19                      | -                                    | -                         | -                                       |
| 590             | 60                                    | $1.78 \times 10^{21}$                            | $2.53 \times 10^{14}$                            | 95.19                      | -                                    | -                         | -                                       |
| 590             | 40                                    | $1.19 \times 10^{21}$                            | $1.69 \times 10^{14}$                            | 95.19                      | -                                    | -                         | -                                       |
| 590             | 20                                    | $5.95 \times 10^{20}$                            | $8.45 \times 10^{13}$                            | 95.19                      | -                                    | -                         | -                                       |
| 590             | 10                                    | $2.97 \times 10^{20}$                            | $4.22 \times 10^{13}$                            | 95.19                      | 112.7                                | $2.19 \times 10^{12}$     | 5.18                                    |
| 590             | 5                                     | $1.49 \times 10^{20}$                            | $2.11 \times 10^{13}$                            | 95.19                      | 112.1                                | $2.11 \times 10^{12}$     | 10.00                                   |
| 656             | 80                                    | $2.65 \times 10^{21}$                            | $3.76 \times 10^{14}$                            | 95.19                      | 133.3                                | $4.76 \times 10^{12}$     | 1.27                                    |
| 656             | 60                                    | $1.98 \times 10^{21}$                            | $2.82 \times 10^{14}$                            | 95.19                      | 132                                  | $4.60 \times 10^{12}$     | 1.63                                    |
| 656             | 40                                    | $1.32 \times 10^{21}$                            | $1.88 \times 10^{14}$                            | 95.19                      | 129.8                                | $4.32 \times 10^{12}$     | 2.30                                    |
| 656             | 20                                    | $6.61 \times 10^{20}$                            | $9.39 \times 10^{13}$                            | 95.19                      | 122.8                                | $3.45 \times 10^{12}$     | 3.67                                    |
| 656             | 10                                    | $3.31 \times 10^{20}$                            | $4.70 \times 10^{13}$                            | 95.19                      | 116.5                                | $2.66 \times 10^{12}$     | 5.67                                    |
| 656             | 5                                     | $1.65 \times 10^{20}$                            | $2.35 \times 10^{13}$                            | 95.19                      | 99.9                                 | $5.88 \times 10^{11}$     | 2.50                                    |

**Table S4.** Calculation details when light illumination was carried out from 656 nm to 420 nm.

| Wavelength (nm) | Light intensity (mW/cm <sup>2</sup> ) | Photon flux (# of photons/sec × m <sup>2</sup> ) | # of photons (0.02 sec and 3-mm-diameter circle) | Dark Faradaic current (μA) | Photo-assisted Faradaic current (μA) | 0.02 sec (# of electrons) | Conversion Efficiency (%) at peak in CV |
|-----------------|---------------------------------------|--------------------------------------------------|--------------------------------------------------|----------------------------|--------------------------------------|---------------------------|-----------------------------------------|
| 420             | 80                                    | $1.69 \times 10^{21}$                            | $2.40 \times 10^{14}$                            | 91.46                      | 144.8                                | $6.66 \times 10^{12}$     | 2.77                                    |
| 420             | 60                                    | $1.27 \times 10^{21}$                            | $1.80 \times 10^{14}$                            | 91.46                      | 142.7                                | $6.40 \times 10^{12}$     | 3.55                                    |
| 420             | 40                                    | $8.47 \times 10^{20}$                            | $1.20 \times 10^{14}$                            | 91.46                      | 139.4                                | $5.98 \times 10^{12}$     | 4.98                                    |
| 420             | 20                                    | $4.23 \times 10^{20}$                            | $6.01 \times 10^{13}$                            | 91.46                      | 133                                  | $5.19 \times 10^{12}$     | 8.63                                    |
| 420             | 10                                    | $2.12 \times 10^{20}$                            | $3.01 \times 10^{13}$                            | 91.46                      | 126.2                                | $4.34 \times 10^{12}$     | 14.43                                   |
| 420             | 5                                     | $1.06 \times 10^{20}$                            | $1.50 \times 10^{13}$                            | 91.46                      | 120.8                                | $3.66 \times 10^{12}$     | 24.37                                   |
| 455             | 80                                    | $1.83 \times 10^{21}$                            | $2.61 \times 10^{14}$                            | 91.46                      | 147.5                                | $7.00 \times 10^{12}$     | 2.69                                    |
| 455             | 60                                    | $1.38 \times 10^{21}$                            | $1.95 \times 10^{14}$                            | 91.46                      | 145                                  | $6.68 \times 10^{12}$     | 3.42                                    |
| 455             | 40                                    | $9.17 \times 10^{20}$                            | $1.30 \times 10^{14}$                            | 91.46                      | 142.1                                | $6.32 \times 10^{12}$     | 4.85                                    |
| 455             | 20                                    | $4.59 \times 10^{20}$                            | $6.51 \times 10^{13}$                            | 91.46                      | 134.9                                | $5.42 \times 10^{12}$     | 8.33                                    |
| 455             | 10                                    | $2.29 \times 10^{20}$                            | $3.26 \times 10^{13}$                            | 91.46                      | 128.2                                | $4.59 \times 10^{12}$     | 14.08                                   |
| 455             | 5                                     | $1.15 \times 10^{20}$                            | $1.63 \times 10^{13}$                            | 91.46                      | 120.1                                | $3.58 \times 10^{12}$     | 21.96                                   |
| 505             | 80                                    | $2.04 \times 10^{21}$                            | $2.89 \times 10^{14}$                            | 91.46                      | -                                    | -                         | -                                       |
| 505             | 60                                    | $1.53 \times 10^{21}$                            | $2.17 \times 10^{14}$                            | 91.46                      | 145.8                                | $6.78 \times 10^{12}$     | 3.13                                    |
| 505             | 40                                    | $1.02 \times 10^{21}$                            | $1.45 \times 10^{14}$                            | 91.46                      | 142.5                                | $6.37 \times 10^{12}$     | 4.41                                    |
| 505             | 20                                    | $5.09 \times 10^{20}$                            | $7.23 \times 10^{13}$                            | 91.46                      | 135.4                                | $5.49 \times 10^{12}$     | 7.59                                    |
| 505             | 10                                    | $2.55 \times 10^{20}$                            | $3.61 \times 10^{13}$                            | 91.46                      | 127.7                                | $4.52 \times 10^{12}$     | 12.52                                   |
| 505             | 5                                     | $1.27 \times 10^{20}$                            | $1.81 \times 10^{13}$                            | 91.46                      | 119.5                                | $3.50 \times 10^{12}$     | 19.37                                   |
| 530             | 80                                    | $2.14 \times 10^{21}$                            | $3.03 \times 10^{14}$                            | 91.46                      | -                                    | -                         | -                                       |
| 530             | 60                                    | $1.60 \times 10^{21}$                            | $2.28 \times 10^{14}$                            | 91.46                      | -                                    | -                         | -                                       |
| 530             | 40                                    | $1.07 \times 10^{21}$                            | $1.52 \times 10^{14}$                            | 91.46                      | 143.1                                | $6.45 \times 10^{12}$     | 4.25                                    |
| 530             | 20                                    | $5.34 \times 10^{20}$                            | $7.59 \times 10^{13}$                            | 91.46                      | 136                                  | $5.56 \times 10^{12}$     | 7.33                                    |
| 530             | 10                                    | $2.67 \times 10^{20}$                            | $3.79 \times 10^{13}$                            | 91.46                      | 129.6                                | $4.76 \times 10^{12}$     | 12.55                                   |
| 530             | 5                                     | $1.34 \times 10^{20}$                            | $1.90 \times 10^{13}$                            | 91.46                      | 118.8                                | $3.41 \times 10^{12}$     | 18.00                                   |
| 590             | 80                                    | $2.38 \times 10^{21}$                            | $3.38 \times 10^{14}$                            | 91.46                      | -                                    | -                         | -                                       |
| 590             | 60                                    | $1.78 \times 10^{21}$                            | $2.53 \times 10^{14}$                            | 91.46                      | -                                    | -                         | -                                       |
| 590             | 40                                    | $1.19 \times 10^{21}$                            | $1.69 \times 10^{14}$                            | 91.46                      | -                                    | -                         | -                                       |
| 590             | 20                                    | $5.95 \times 10^{20}$                            | $8.45 \times 10^{13}$                            | 91.46                      | -                                    | -                         | -                                       |
| 590             | 10                                    | $2.97 \times 10^{20}$                            | $4.22 \times 10^{13}$                            | 91.46                      | 131.8                                | $5.04 \times 10^{12}$     | 11.93                                   |
| 590             | 5                                     | $1.49 \times 10^{20}$                            | $2.11 \times 10^{13}$                            | 91.46                      | 122.8                                | $3.91 \times 10^{12}$     | 18.53                                   |
| 656             | 80                                    | $2.65 \times 10^{21}$                            | $3.76 \times 10^{14}$                            | 91.46                      | 152.6                                | $7.63 \times 10^{12}$     | 2.03                                    |
| 656             | 60                                    | $1.98 \times 10^{21}$                            | $2.82 \times 10^{14}$                            | 91.46                      | 150                                  | $7.31 \times 10^{12}$     | 2.59                                    |
| 656             | 40                                    | $1.32 \times 10^{21}$                            | $1.88 \times 10^{14}$                            | 91.46                      | 146.4                                | $6.86 \times 10^{12}$     | 3.65                                    |
| 656             | 20                                    | $6.61 \times 10^{20}$                            | $9.39 \times 10^{13}$                            | 91.46                      | 139.5                                | $6.00 \times 10^{12}$     | 6.39                                    |
| 656             | 10                                    | $3.31 \times 10^{20}$                            | $4.70 \times 10^{13}$                            | 91.46                      | 130.3                                | $4.85 \times 10^{12}$     | 10.33                                   |
| 656             | 5                                     | $1.65 \times 10^{20}$                            | $2.34 \times 10^{13}$                            | 91.46                      | 118.9                                | $3.43 \times 10^{12}$     | 14.61                                   |
